# Supplementary material
Source: PubMed Central journal article supplement (PMC6658346)
Supplement: NIHMS1527771-supplement-Supplemental_Table_1.pdf [file NIHMS1527771-supplement-Supplemental_Table_1.pdf]

**Supplemental Table 1. Definition of extracellular vesicles in this paper and their characteristics [1-3]**

| <b>Descriptor</b>     | <b>Approximate size (diameter in nm)</b> | <b>Other characteristics</b>                                                          |
|-----------------------|------------------------------------------|---------------------------------------------------------------------------------------|
| Casein micelle        | 50 - 600                                 | Positive for $\alpha$ -casein                                                         |
| Exosome               | 30 - 150                                 | Positive for CD9, CD63, Alix and HSP70; negative for histone H3 and calnexin          |
| Exosome-sized vesicle | <200                                     |                                                                                       |
| Extracellular vesicle | 30 - 5,000                               | Exosomes (30-150 nm), microvesicles (200-1,000 nm), apoptotic bodies (up to 5,000 nm) |
| Fat globule           | 200 - larger than 15,000                 | Positive for butyrophilin and xanthine dehydrogenase                                  |
