# Supplementary material
Source: PubMed Central journal article supplement (PMC6658346)
Supplement: NIHMS1527771-supplement-Supplemental_Table_2.pdf [file NIHMS1527771-supplement-Supplemental_Table_2.pdf]

**Supplemental Table 2. Macronutrient content (per 148 mL reconstitution volume) and ingredients as per packing label**

| <b>Formula</b>   | <b>Fat<br/>(gm)</b> | <b>Carbohydrates<br/>(gm)</b> | <b>Protein<br/>(gm)</b> | <b>Ingredients</b>                                                                                                                                                                                                                                                                                                                                                                                                                                                                                                                                                                                                                                                                                                                                                                                                                                                                                                                                                                                                                                                                                                                                      |
|------------------|---------------------|-------------------------------|-------------------------|---------------------------------------------------------------------------------------------------------------------------------------------------------------------------------------------------------------------------------------------------------------------------------------------------------------------------------------------------------------------------------------------------------------------------------------------------------------------------------------------------------------------------------------------------------------------------------------------------------------------------------------------------------------------------------------------------------------------------------------------------------------------------------------------------------------------------------------------------------------------------------------------------------------------------------------------------------------------------------------------------------------------------------------------------------------------------------------------------------------------------------------------------------|
| <b>Formula 1</b> | 5.1                 | 11.6                          | 2.2                     | Whey Protein Concentrate (from Milk, Enzymatically Hydrolyzed, Reduced in Minerals), Vegetable Oils (Palm Olein, Soy, Coconut, and High-Oleic Safflower or High-Oleic Sunflower), Corn Maltodextrin, Lactose, Galacto-Oligosaccharides (a Prebiotic Sourced from Milk), and Less than 2% of: Potassium Citrate, Potassium Phosphate, Calcium Chloride, Calcium Phosphate, Sodium Citrate, Magnesium Chloride, Ferrous Sulfate, Zinc Sulfate, Copper Sulfate, Potassium Iodide, Manganese Sulfate, Sodium Selenate, <i>M. alpina</i> Oil (a Source of Arachidonic Acid [ARA]), <i>C. cohnii</i> Oil (a Source of Docosahexaenoic Acid [DHA]), Sodium Ascorbate, Inositol, Choline Bitartrate, Alpha-Tocopheryl Acetate, Niacinamide, Calcium Pantothenate, Riboflavin, Vitamin A Acetate, Pyridoxine Hydrochloride, Thiamine Mononitrate, Folic Acid, Phylloquinone, Biotin, Vitamin D3, Vitamin B12, Taurine, Nucleotides (Cytidine 5'-Monophosphate, Disodium Uridine 5'-Monophosphate, Adenosine 5'-Monophosphate, Disodium Guanosine 5'-Monophosphate), Ascorbyl Palmitate, Mixed Tocopherols, L-Carnitine, <i>B. lactis</i> Cultures, Soy Lecithin. |
| <b>Formula 2</b> | 5.6                 | 10.7                          | 2.1                     | Nonfat Milk, Lactose, Whey Protein Concentrate, High Oleic Safflower Oil, Soy Oil, Coconut Oil, Galacto-Oligosaccharides, Less than 2% of: <i>C. cohnii</i> Oil, <i>M. alpina</i> Oil, Beta-Carotene, Lutein, Lycopene, Potassium Citrate, Calcium Carbonate, Ascorbic Acid, Soy Lecithin, Potassium Chloride, Magnesium Chloride, Ferrous Sulfate, Choline Bitartrate, Choline Chloride, Ascorbyl Palmitate, Salt, Taurine, M-Inositol, Zinc Sulfate, Mixed Tocopherols, D-Alpha-Tocopheryl Acetate, Niacinamide, Calcium Pantothenate, L-Carnitine, Vitamin A Palmitate, Cupric Sulfate, Thiamine Chloride Hydrochloride, Riboflavin, Pyridoxine Hydrochloride, Folic Acid, Manganese Sulfate, Phylloquinone, Biotin, Sodium Selenate, Vitamin D3, Cyanocobalamin, Calcium Phosphate, Potassium Phosphate, Potassium Hydroxide and Nucleotides (Adenosine 5'-Monophosphate, Cytidine 5'-Monophosphate, Disodium Guanosine 5'-Monophosphate, Disodium Uridine 5'-Mono-Phosphate).                                                                                                                                                                      |
| <b>Formula 3</b> | 5.3                 | 11.3                          | 2.0                     | Nonfat Milk, Lactose, Vegetable Oil (Palm Olein, Coconut, Soy, and High Oleic Sunflower Oils), Whey Protein Concentrate, and Less than 2%: Galactooligosaccharides (a Type of Prebiotic), Polydextrose (a Type of Prebiotic), <i>Mortierella alpina</i> Oil (a Source of Arachidonic Acid [ARA]), <i>Cryptocodium cohnii</i> Oil (a Source of Docosahexaenoic Acid [DHA]) Calcium Carbonate, Potassium Citrate, Ferrous Sulfate, Potassium Chloride, Magnesium Oxide, Sodium Chloride, Zinc Sulfate, Cupric Sulfate, Manganese Sulfate, Potassium Iodide, Sodium Selenite, Soy Lecithin, Choline Chloride, Ascorbic Acid, Niacinamide, Calcium Pantothenate, Vitamin A Palmitate, Vitamin B12, Vitamin D3, Riboflavin, Thiamine Hydrochloride, Vitamin B6 Hydrochloride, Folic Acid, Vitamin K1, Biotin, Inositol, Vitamin E Acetate, Nucleotides (Cytidine 5'-Monophosphate, Disodium Uridine 5'-Monophosphate, Adenosine 5'-Monophosphate, Disodium Guanosine 5'-Monophosphate), Taurine, L-Carnitine.                                                                                                                                                |
