# Supplementary material
Source: PubMed Central journal article supplement (PMC6658346)
Supplement: NIHMS1527771-supplement-Supplemental_Table_3.pdf [file NIHMS1527771-supplement-Supplemental_Table_3.pdf]

**Supplemental Table 3. Primers used in RT-qPCR analysis**

| <b>microRNA</b>               | <b>Forward primer (5'-3')<sup>1</sup></b> |
|-------------------------------|-------------------------------------------|
| miSpike                       | CTCAGGATGGCGGAGCGGTCT                     |
| hsa-miR-30d-5p/bta-miR-30d    | ACATCCCCGACTGGAAG                         |
| hsa-miR-125a-5p/bta-miR-125a  | GAGACCCTTTAACCTGTGA                       |
| hsa-miR-423-5p/bta-miR-423-5p | GCAGAGAGCGAGACTTT                         |

<sup>1</sup>Qiagen's miScript Universal Primer was used as reverse primer for all reactions. Human microRNA (miR) sequences are shown; miSpike is a synthetic, non-natural sequence.
